# Supplementary material for: Soil Test Based Fertilizer Application Improves Productivity, Profitability and Nutrient Use Efficiency of Rice (Oryza sativa L.) under Direct Seeded Condition
Source: MDPI journal article supplement (doi:10.3390/agronomy11091756), 2021-08-31
Supplement: s1 [file s1]

**Table S1.** Detailed N, P and K treatment combinations used for test crop experimentation

| Number of treatments' | Treatment combination |                  |                  | Amount of nutrient<br>(kg ha <sup>-1</sup> ) |                               |                  | FYM<br>(Mg ha <sup>-1</sup> ) |
|-----------------------|-----------------------|------------------|------------------|----------------------------------------------|-------------------------------|------------------|-------------------------------|
|                       | N                     | P <sub>2</sub> O | K <sub>2</sub> O | N                                            | P <sub>2</sub> O <sub>5</sub> | K <sub>2</sub> O |                               |
| 1                     | 0                     | 0                | 0                | 0                                            | 0                             | 0                | 0                             |
| 2                     | 0                     | 0                | 0                | 0                                            | 0                             | 0                | 5                             |
| 3                     | 0                     | 0                | 0                | 0                                            | 0                             | 0                | 10                            |
| 4                     | 0                     | 2                | 2                | 0                                            | 60                            | 40               | 0                             |
| 5                     | 1                     | 1                | 1                | 60                                           | 30                            | 20               | 10                            |
| 6                     | 1                     | 1                | 2                | 60                                           | 30                            | 40               | 0                             |
| 7                     | 1                     | 2                | 1                | 60                                           | 60                            | 20               | 10                            |
| 8                     | 1                     | 2                | 2                | 60                                           | 60                            | 40               | 5                             |
| 9                     | 2                     | 1                | 1                | 120                                          | 30                            | 20               | 10                            |
| 10                    | 2                     | 0                | 2                | 120                                          | 0                             | 40               | 10                            |
| 11                    | 2                     | 1                | 2                | 120                                          | 30                            | 40               | 5                             |
| 12                    | 2                     | 2                | 0                | 120                                          | 60                            | 0                | 5                             |
| 13                    | 2                     | 2                | 1                | 120                                          | 60                            | 20               | 10                            |
| 14                    | 2                     | 2                | 2                | 120                                          | 60                            | 40               | 5                             |
| 15                    | 2                     | 2                | 3                | 120                                          | 60                            | 60               | 10                            |
| 16                    | 2                     | 3                | 2                | 120                                          | 90                            | 40               | 5                             |
| 17                    | 2                     | 3                | 3                | 120                                          | 90                            | 60               | 0                             |
| 18                    | 3                     | 1                | 1                | 180                                          | 30                            | 20               | 0                             |
| 19                    | 3                     | 2                | 1                | 180                                          | 60                            | 20               | 10                            |
| 20                    | 3                     | 2                | 2                | 180                                          | 60                            | 40               | 5                             |
| 21                    | 3                     | 3                | 1                | 180                                          | 90                            | 20               | 5                             |
| 22                    | 3                     | 3                | 2                | 180                                          | 90                            | 40               | 0                             |
| 23                    | 3                     | 2                | 3                | 180                                          | 60                            | 60               | 0                             |
| 24                    | 3                     | 3                | 3                | 180                                          | 90                            | 60               | 0                             |

Number 0, 1, 2 and 3 indicate four levels of N, P and K applied in the experiment.
